# Supplementary material
Source: PubMed Central journal article supplement (PMC4596658)
Supplement: supp_115.177592_FigureS1.pdf [file supp_115.177592_FigureS1.pdf]

## Supplemental figures

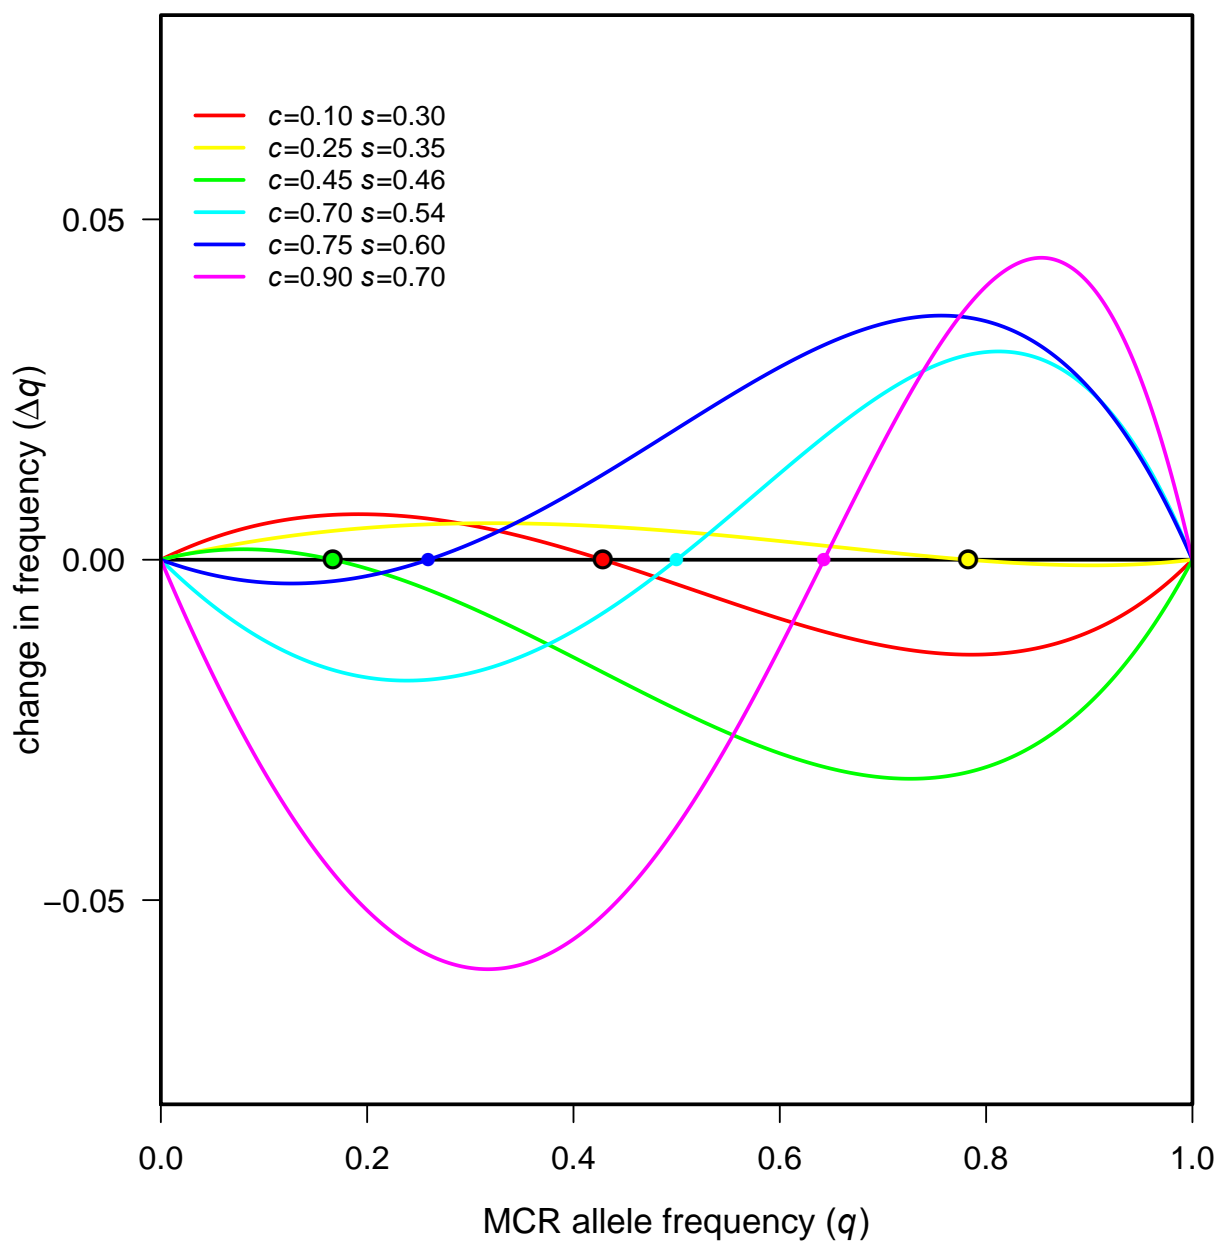

**Figure S1** The change in MCR allele frequency ( $\Delta q$ ) near equilibrium reveals the local stability of the equilibrium. Positive slopes are associated with unstable equilibria and negative slopes are associated with stable equilibria (black borders on circles). Fitness costs are recessive ( $h = 0$ ).
