# Supplementary material
Source: PubMed Central journal article supplement (PMC4596658)
Supplement: supp_115.177592_FigureS2.pdf [file supp_115.177592_FigureS2.pdf]

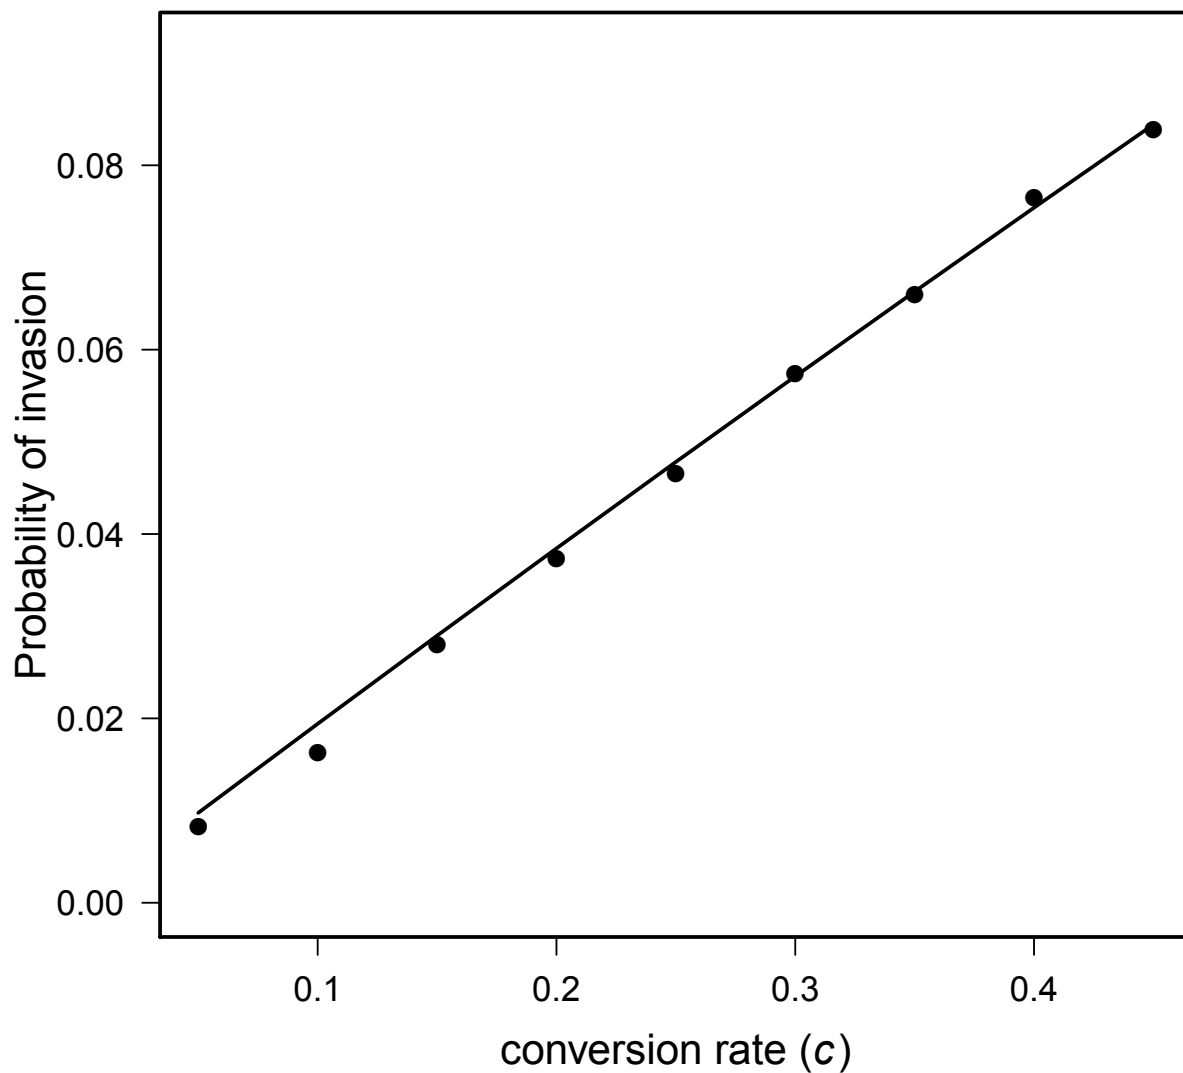

**Figure S2** The probability that an MCR allele escapes stochastic loss when rare, when parameters allow for a stable internal equilibrium. Dark line represents empirical approximation (equation 4) and points represent the proportion of 100,000 simulation realizations resulting in invasion. The starting frequency of the MCR allele in each realization is  $q_0 = \frac{1}{2N_e}$ , the population size is  $N_e = 10,000$ , the fitness cost is  $s = 0.451$  and fitness costs are recessive ( $h = 0$ ).
