# Supplementary material
Source: PubMed Central journal article supplement (PMC4596658)
Supplement: supp_115.177592_FigureS3.pdf [file supp_115.177592_FigureS3.pdf]

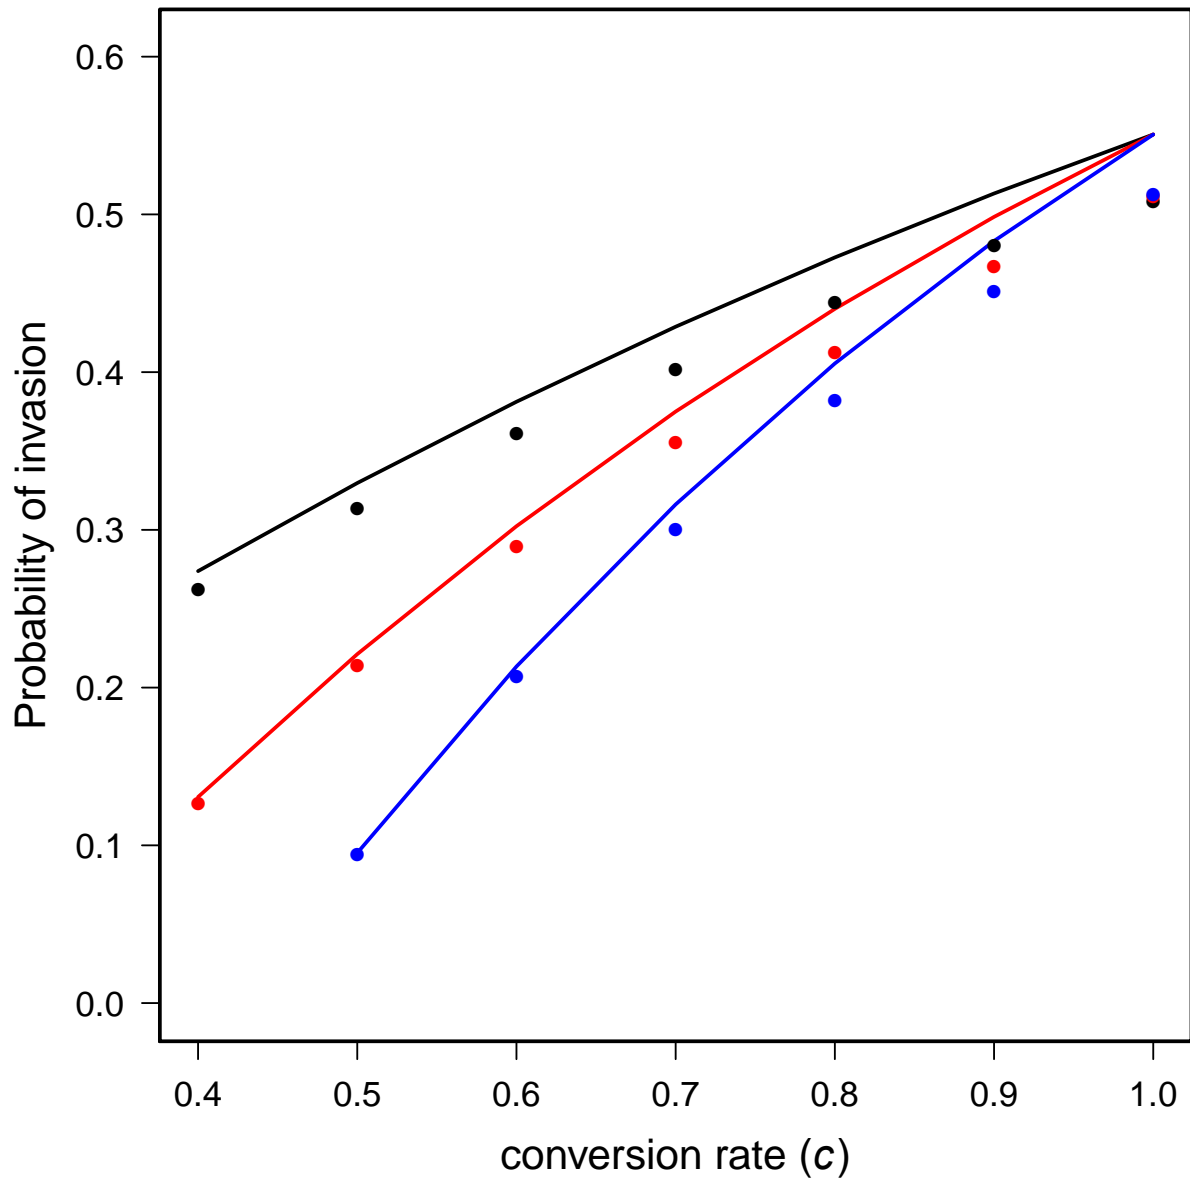

**Figure S3** The probability that an MCR allele escapes stochastic loss when rare and becomes fixed when parameters allow for fixation without internal equilibrium. Lines represent the empirical approximation (equation 4) and points represent the proportion of 100,000 simulation realizations resulting in invasion. The starting frequency of the MCR allele in each realization is  $q_0 = \frac{1}{2N_e}$ , the population size is  $N_e = 10,000$ , the fitness cost is  $s = 0.4$  and blue represents dominant ( $h = 1$ ) fitness costs, red represents additive ( $h = 0.5$ ) fitness costs and black represents recessive ( $h = 0$ ) fitness costs.
