# Supplementary material
Source: PubMed Central journal article supplement (PMC4596658)
Supplement: supp_115.177592_FigureS4.pdf [file supp_115.177592_FigureS4.pdf]

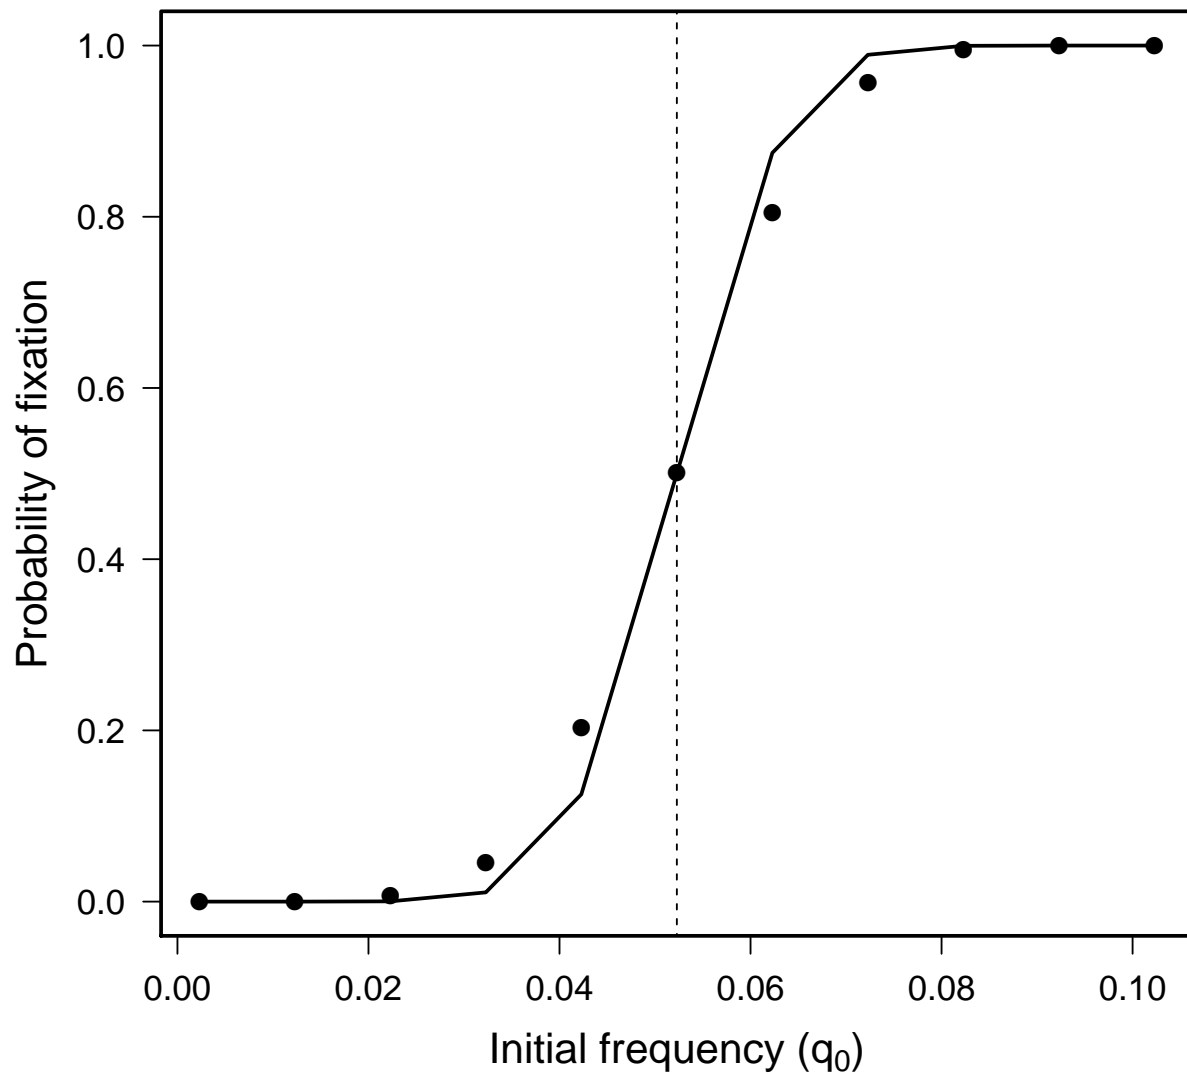

**Figure S4** The probability that an MCR allele escapes stochastic loss when introduced near its equilibrium and becomes fixed when parameters allow for an unstable internal equilibrium. Line represents the empirical approximation (equation A2.5) and points represent the proportion of 100,000 simulation realizations resulting in invasion. The conversion efficiency is  $c = 0.8$ , the population size is  $N_e = 10,000$ , the fitness cost is  $s = 0.51$  and fitness effects are recessive ( $h = 0$ ). Dashed line represents the unstable equilibrium frequency.
